# Supplementary material for: Tumor-penetrating iron oxide nanoclusters for T1/T2 dual mode MR imaging-guided combination therapy
Source: Royal Society of Chemistry journal article supplement (doi:10.1039/d2bm00667g), 2022-01-01
Supplement: d2bm00667g1.pdf [file d2bm00667g1.pdf]

## Supporting Information

### **Tumor-penetrating iron oxide nanoclusters for T<sub>1</sub>/T<sub>2</sub> dual mode MR imaging-guided combination therapy**

Jing Li<sup>1,a</sup>, Siman Gong<sup>1,a</sup>, Shiyu Li<sup>a</sup>, Xinchong Li<sup>a</sup>, Siyi Lan<sup>a</sup>, Minjie Sun<sup>\*,a</sup>

<sup>a</sup>State Key Laboratory of Natural Medicines, Department of Pharmaceutics, China  
Pharmaceutical University, Nanjing 210009, China.

\*Corresponding author

E-mail address: [msun@cpu.edu.cn](mailto:msun@cpu.edu.cn) (M. Sun)

<sup>1</sup>The first two authors contributed equally to this paper.

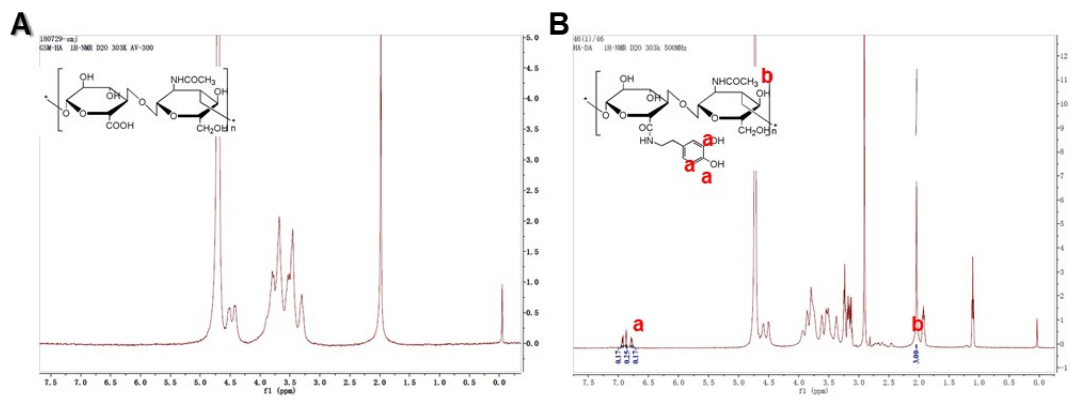

**Figure S1.** The <sup>1</sup>H-NMR spectra of HA (A) and HA-DA (B).

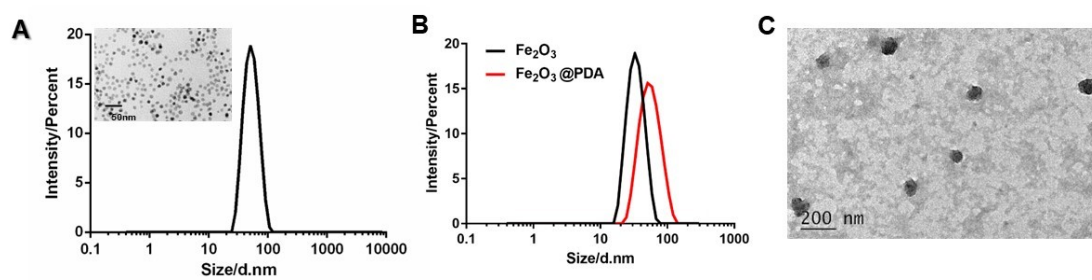

**Figure S2.** (A) Frequency curve of size distribution of Fe<sub>2</sub>O<sub>3</sub> nanoparticles. Inset: TEM image of Fe<sub>2</sub>O<sub>3</sub> nanoparticles. (B) Frequency curve of size distribution of Fe<sub>2</sub>O<sub>3</sub> nanoparticles and Fe<sub>2</sub>O<sub>3</sub>@PDA nanoparticles. (C) TEM image of Fe<sub>2</sub>O<sub>3</sub>@PDA.

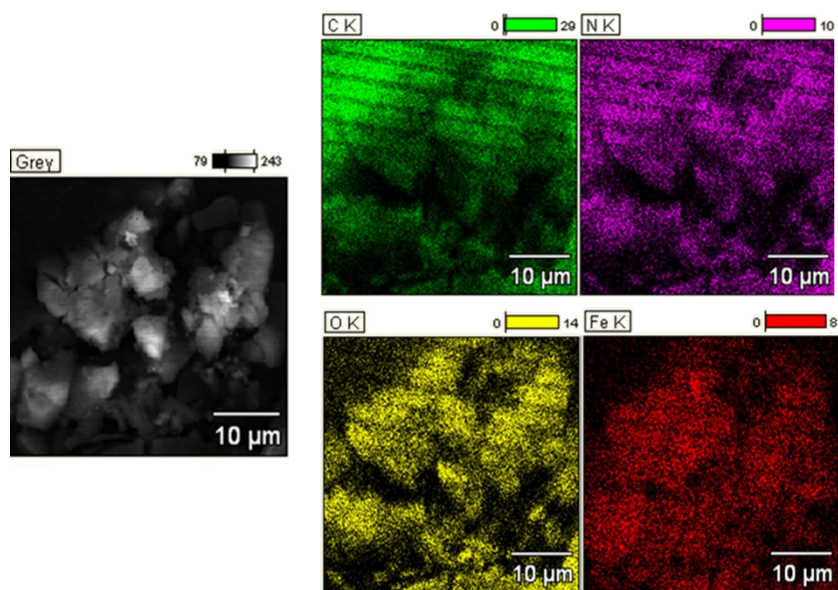

**Figure S3.** FESEM image and corresponding elemental composition images of Fe<sub>2</sub>O<sub>3</sub>@PFH NCs.

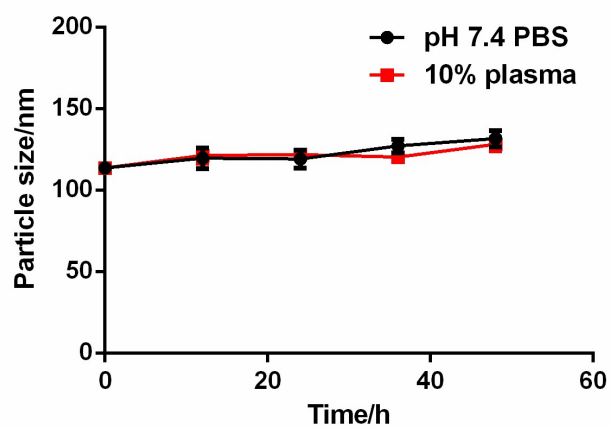

**Figure S4.** Change in particle size of  $\text{Fe}_2\text{O}_3@$ PFH nanocluster after incubating in PBS buffer solution (pH 7.4) and 10 % plasma.

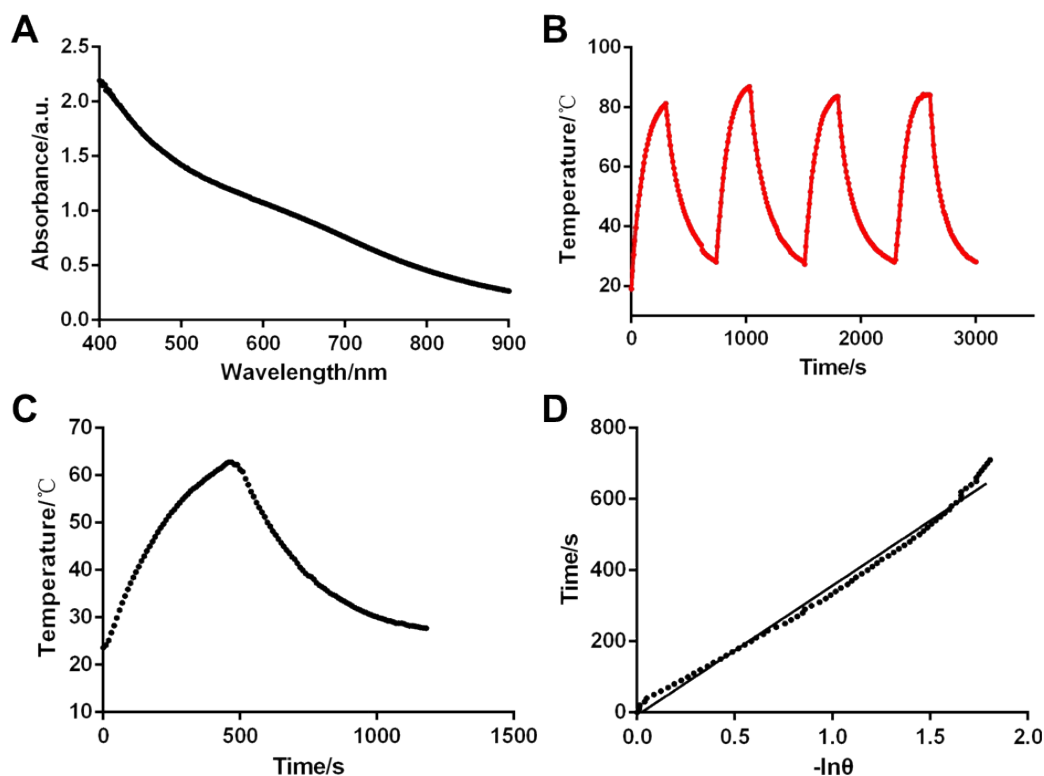

**Figure S5.** (A) UV-vis spectra of the Fe<sub>2</sub>O<sub>3</sub>@PFH nanocluster. (B) The temperature change of the Fe<sub>2</sub>O<sub>3</sub>@PFH NCs solution (0.50 mg/mL) upon four circles of NIR laser irradiation (808 nm, 1.6 W/cm<sup>2</sup>) that was repeated on and off at a cycle of 750 s. (C) The temperature change of the Fe<sub>2</sub>O<sub>3</sub>@PFH nanocluster under laser irradiation (808 nm, 1.6 W/cm<sup>2</sup>). The laser was switched off until the temperature reached the peak. (D) Linear time data from the cooling period (after 500 s in Figure S5C) vs. negative natural logarithm of driving force temperature. The slope of the linear line was the time constant for heat transfer of the system (364.72 s).

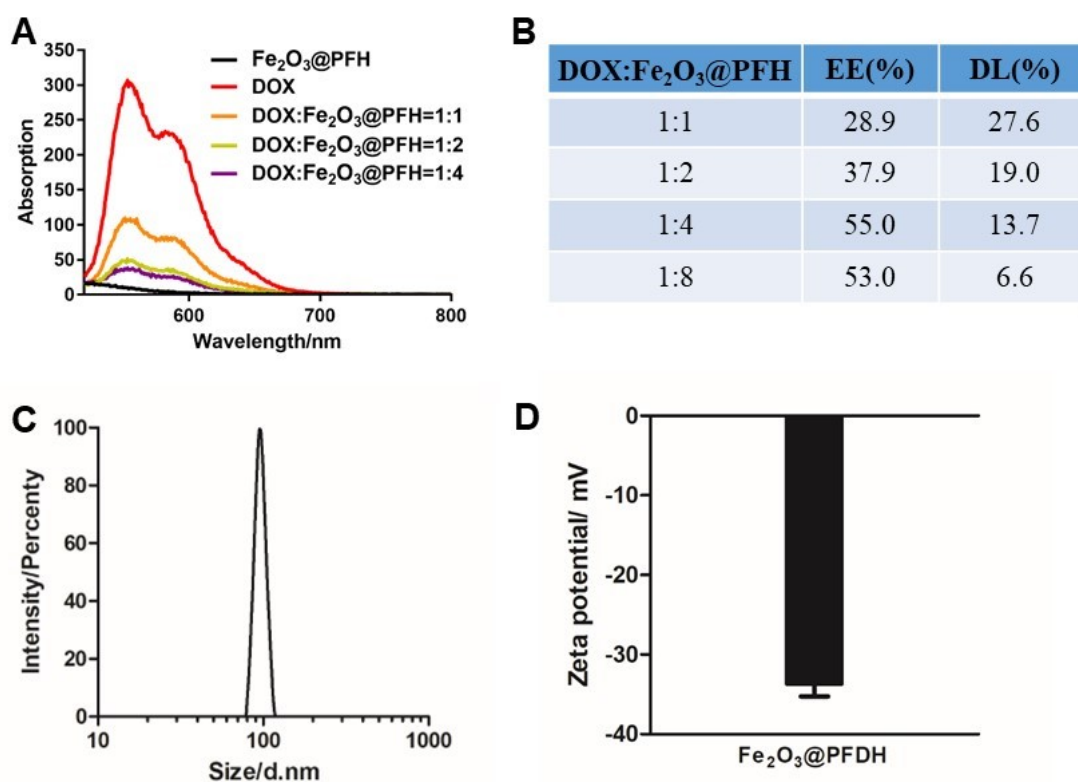

**Figure S6.** (A) Fluorescence measurement of mixture of Fe<sub>2</sub>O<sub>3</sub>@PFH and DOX with different weight ratio at 488 nm. (B) Encapsulation efficiency and drug loading content of Fe<sub>2</sub>O<sub>3</sub>@PFDH with the different ratio (w/w). (C) Particle size distribution and (D) zeta potential of Fe<sub>2</sub>O<sub>3</sub>@PFDH detected by DLS.

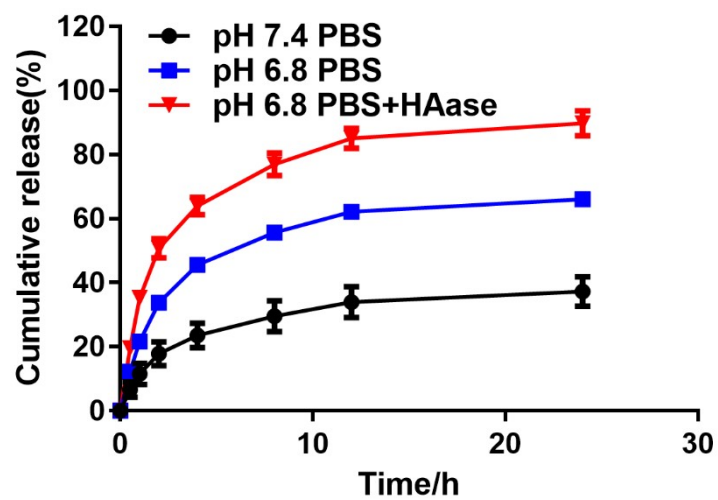

**Figure S7.** The release curve of DOX from  $\text{Fe}_2\text{O}_3@\text{PFDH}$  NCs under the different conditions of pH 7.4, pH 6.8, PBS or pH 6.8 PBS with HAase (1 mg/mL) at 37 °C.



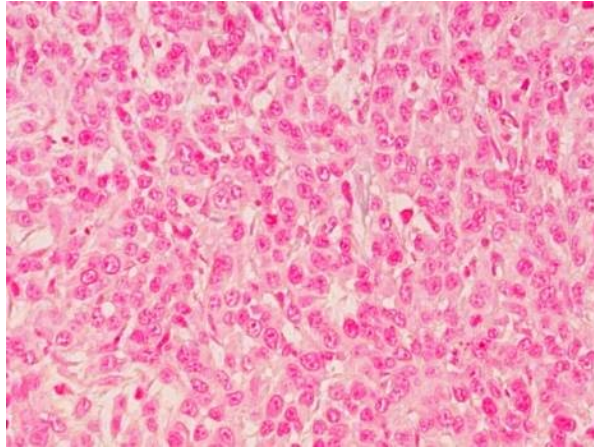

**Figure S8.** Prussian blue staining images of the tumor section from mice upon 24 h of injection of saline.

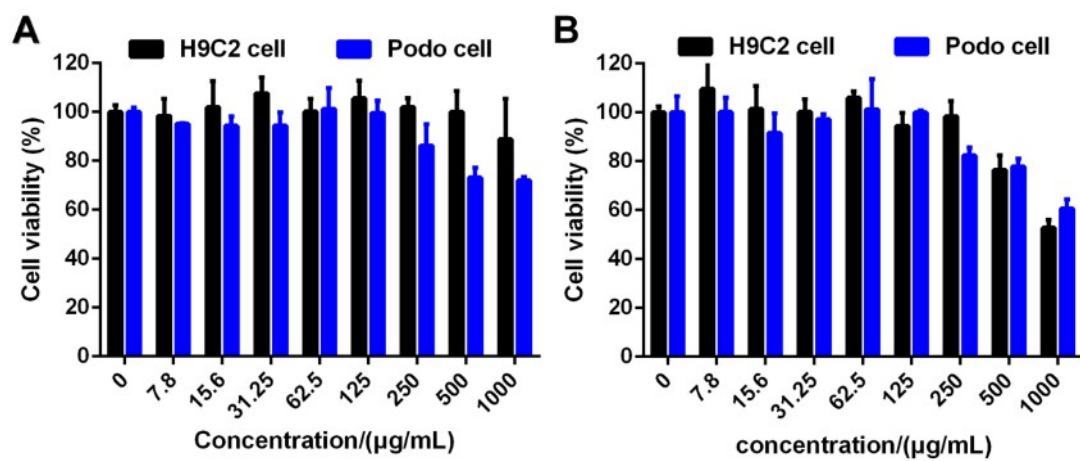

**Figure S9.** Cell viability of H9C2 and Podo cells after incubation with different concentrations of Fe<sub>2</sub>O<sub>3</sub>@PFH(A) and HA-DA(B).

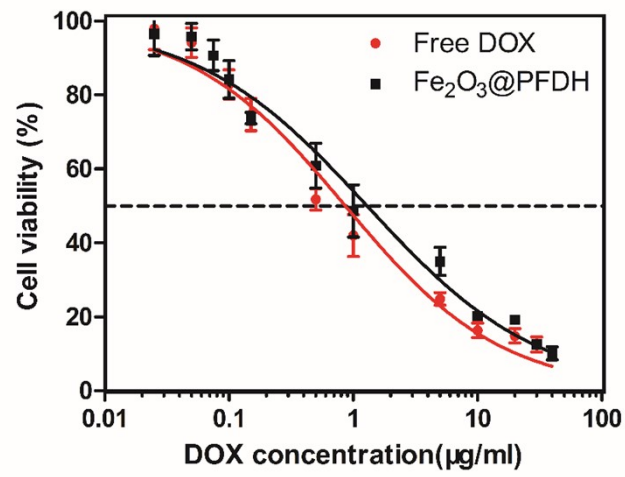

**Figure S10.** Cell viability of 4T1 cells treated by free DOX and Fe<sub>2</sub>O<sub>3</sub>@PFDH after incubation for 24h. (n=3)

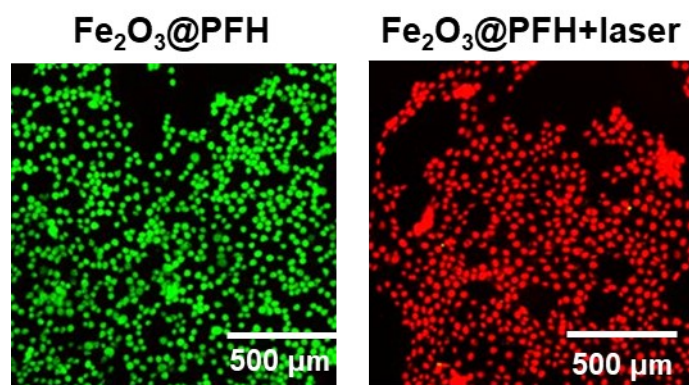

**Figure S11.** Fluorescence images of calcein AM (live cells, green) and PI (dead cells, red) co-stained 4T1 cells after treatments with 0.2 mg/mL of  $\text{Fe}_2\text{O}_3@\text{PFH}$  NCs with or without laser irradiation.

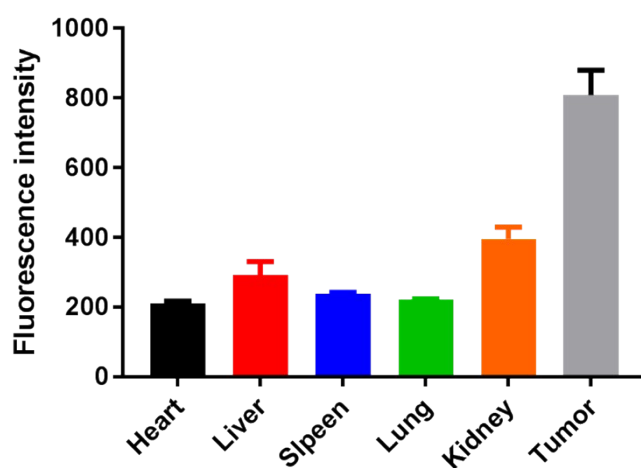

**Figure S12.** The fluorescence intensity of heart, liver, spleen, lung, kidneys and tumor isolated at 24 h post-injection of the Cy7-Fe<sub>2</sub>O<sub>3</sub>@PFH NCs.

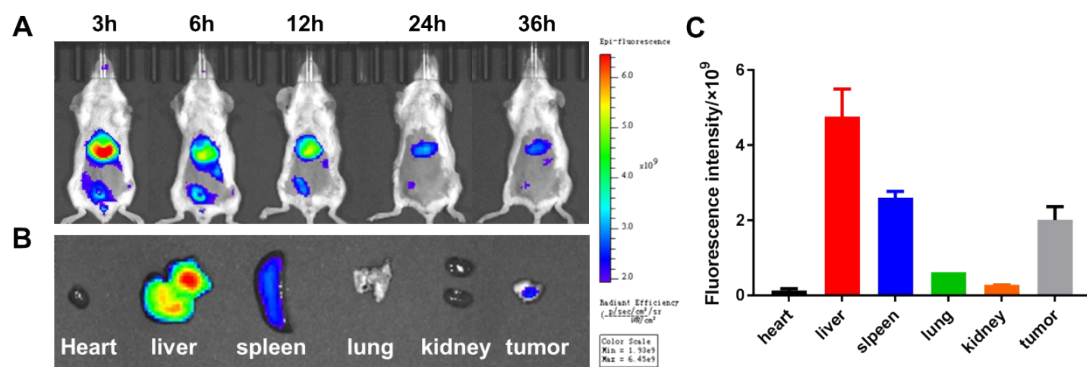

**Figure S13.** The distribution of the free Cy7-NHS ester with tween 80 *in vivo*. (A) Images of mice following intravenous injection of the free Cy7. (B) Images of heart, liver, spleen, lung, kidneys and tumor isolated at 24 h post-injection of the free Cy7. (C) The corresponding fluorescence intensity.

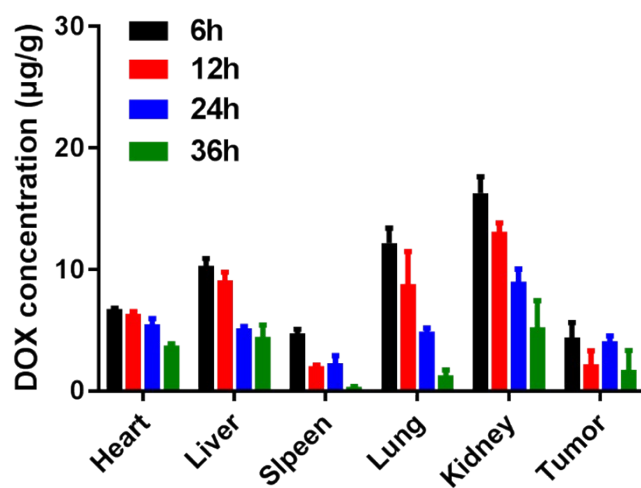

**Figure S14.** Content analysis of DOX in major organs and tumor isolated at predetermined time post-injection of the free DOX.

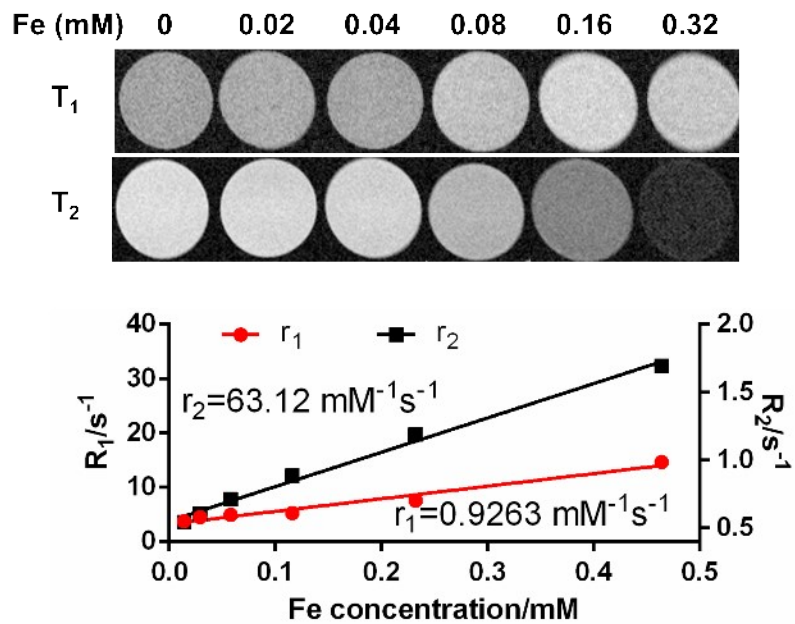

**Figure S15.** The reciprocal values of relaxation times ( $R_1$ ,  $R_2$ ) of  $Fe_2O_3$  nanoparticle versus different concentrations of  $Fe^{3+}$ , and the relaxivity values ( $r_1$ ,  $r_2$ ) were obtained from the slopes of linear fits of experimental data.



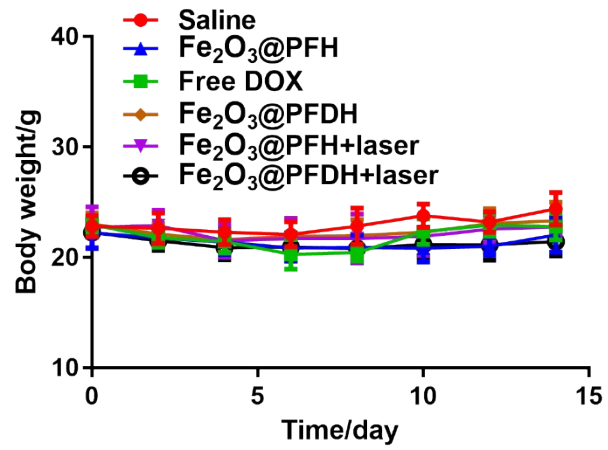

**Figure S16.** Body weight change of 4T1 tumor-bearing mice treated with different preparations.

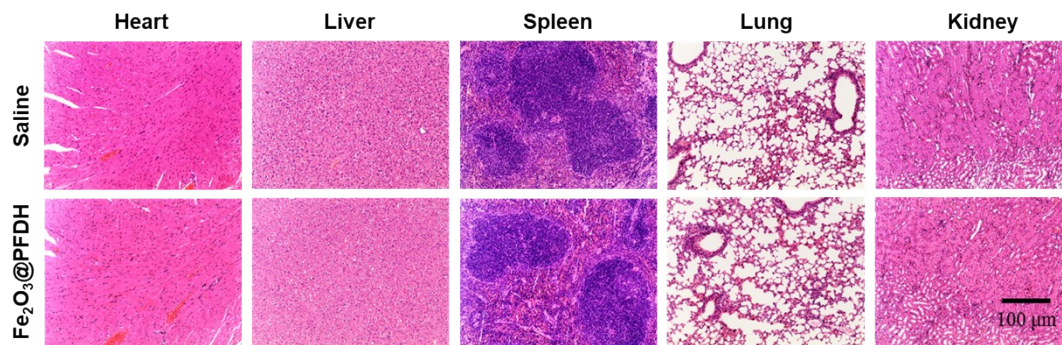

**Figure S17.** H&E staining images of major organs from healthy mice treated with tested dose of the Fe<sub>2</sub>O<sub>3</sub>@PFDH NCs and saline.

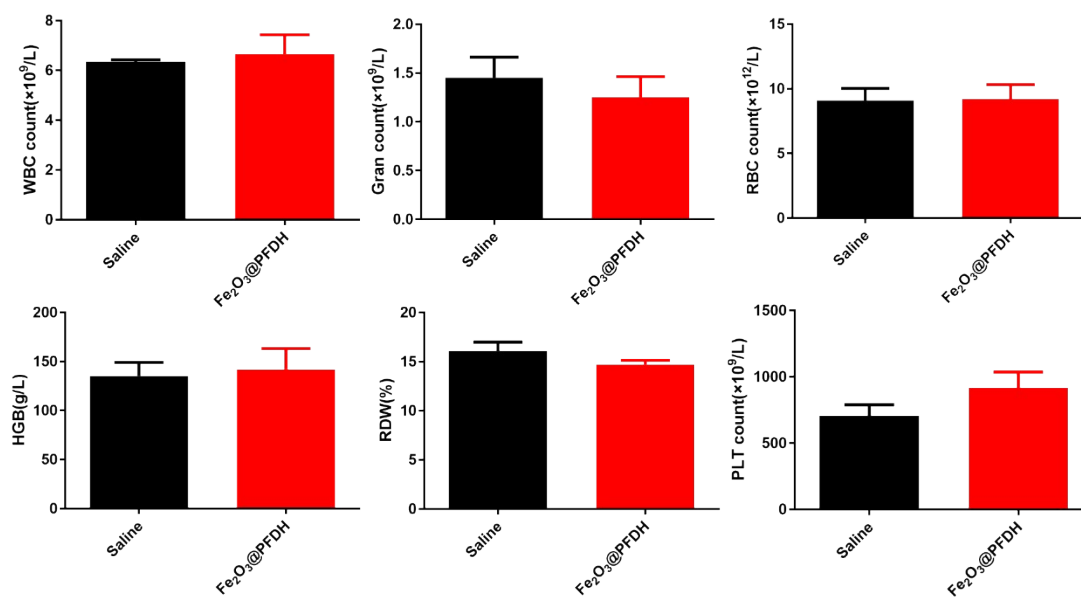

**Figure S18.** Hematology data of the mice treated with saline and Fe<sub>2</sub>O<sub>3</sub>@PFDH.
